# Supplementary material
Source: PubMed Central journal article supplement (PMC10964368)
Supplement: NIHMS1972339-supplement-1.pdf [file NIHMS1972339-supplement-1.pdf]

**Cell Systems, Volume 7**

**Supplemental Information**

**Mantis: A Fast, Small, and Exact**

**Large-Scale Sequence-Search Index**

**Prashant Pandey, Fatemeh Almodaresi, Michael A. Bender, Michael Ferdman, Rob Johnson, and Rob Patro**

## Table S1, related to Table 1, Table 2, and Table 3 – subsection Experimental Procedure

| Min size  | Max size     | Cutoff |
|-----------|--------------|--------|
| 0         | $\leq 300MB$ | 1      |
| $> 300MB$ | $\leq 500MB$ | 3      |
| $> 500MB$ | $\leq 1GB$   | 10     |
| $> 1GB$   | $\leq 3GB$   | 20     |
| $> 3GB$   | $\infty$     | 50     |

Table S1: Minimum number of times a k-mer must appear in an experiment in order to be counted as abundantly represented in that experiment (taken from Solomon & Kingsford (2016)).

## Figure S1, related to STAR Methods – subsection sampling color classes based on abundance

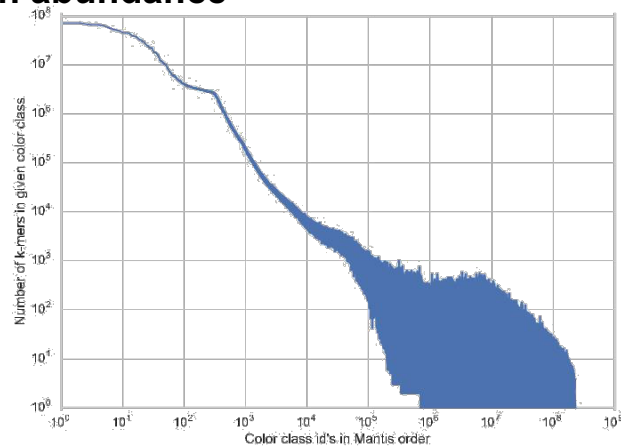

Figure S1: The distribution of the number of k-mers in a color class and ID assigned to the color class. The color class with the most number of k-mers gets the smallest ID. And the color class with least number of k-mers gets the largest ID. This distribu
